# Supplementary material for: Green Tea Leaves and Rosemary Extracts Selectively Induce Cell Death in Triple-Negative Breast Cancer Cells and Cancer Stem Cells and Enhance the Efficacy of Common Chemotherapeutics
Source: Hindawi journal article supplement (doi:10.1155/2024/9458716), 2024-01-25
Supplement: f1 [file 9458716.f1.zip]

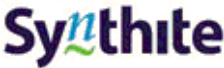

QUALITY ASSURANCE LABORATORY

SYN/QC 05(03)

Email : qchelpdesk@synthite.com

CERTIFICATE OF ANALYSIS

[This test report shall not be reproduced except in full without the written approval of the lab.The results in this report relate to the items tested]

|                    |              |                  |  |
|--------------------|--------------|------------------|--|
| CUSTOMER           |              |                  |  |
| MATERIAL           | Rosemary Ext | DESCRIPTION      |  |
| QUANTITY           | 0.100 KG     | INVOICE NUMBER   |  |
| BATCH NUMBER       | 401H169472   | TRADE NAME       |  |
| INSPECTION LOT NO  | 40000103298  | CUST. MAT. CODE  |  |
| MANUFACTURING DATE |              | BEST BEFORE      |  |
|                    |              | PO REF No / DATE |  |

Remarks

PHYSICAL AND ANALYTICAL DATA

| SLNO | QUALITY PARAMETER            | RESULT           | TEST METHOD                             |
|------|------------------------------|------------------|-----------------------------------------|
|      | Organoleptic Characteristics |                  |                                         |
| 1    | Appearance                   | Ok               | Sensory(QM/1011)                        |
|      | Physical Characteristics     |                  |                                         |
| 1    | Brix                         | 84.4 %           | Spectrometry                            |
| 2    | Solubility                   | Soluble in water | Visual                                  |
|      | Chemical Characteristics     |                  |                                         |
| 1    | Rosmarinic Acid              | 4.6 %            | Liquid Chromatography                   |
|      | Residual Solvent             |                  |                                         |
| 1    | Residual Acetone             | <20 mg/kg        | FCC 12th Edition                        |
|      | Microbiology                 |                  |                                         |
| 1    | T. P. C                      | <10 cfu/g        | BAM,online January,2001 Chapter-3       |
| 2    | T. Y. M. C                   | <10 cfu/g        | BAM, online, April, 2001 Chapter - 18   |
| 3    | E.Coli                       | <3 mpn/g         | BAM, online, February, 2013 Chapter - 4 |
| 4    | Salmonella                   | Absent in 25g    | BAM, online, August, 2016 Chapter - 5   |
|      | Mycotoxin                    |                  |                                         |
| 1    | Aflatoxin-B1                 | <0.5 mg/kg       | ASTA 24.2, 1997 Edition                 |
| 2    | Aflatoxin Total              | <0.5 mg/kg       | ASTA 24.2, 1997 Edition                 |

Approval Date : 08.01.2020

The result of batch no : 401H169472 corresponds to the sample submitted to the lab.

Prepared by :P.  
MANOJKUMAR

Microbiology by :DR K CHANDRASEKARAN

Approved by :SAJU K I
