# Supplementary material for: Green Tea Leaves and Rosemary Extracts Selectively Induce Cell Death in Triple-Negative Breast Cancer Cells and Cancer Stem Cells and Enhance the Efficacy of Common Chemotherapeutics
Source: Hindawi journal article supplement (doi:10.1155/2024/9458716), 2024-01-25
Supplement: f1 [file 9458716.f1.zip]

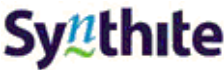

|                                                                                                                                                         |                                         |                                                                                                                        |                                  |
|---------------------------------------------------------------------------------------------------------------------------------------------------------|-----------------------------------------|------------------------------------------------------------------------------------------------------------------------|----------------------------------|
| QUALITY ASSURANCE LABORATORY                                                                                                                            |                                         |                                                                                                                        |                                  |
| SYN/QLC-024/E                                                                                                                                           |                                         | Email : qchelpdesk@synthite.com                                                                                        |                                  |
| CERTIFICATE OF ANALYSIS                                                                                                                                 |                                         |                                                                                                                        |                                  |
| [This test report shall not be reproduced except in full without the written approval of the lab.The results in this report relate to the items tested] |                                         |                                                                                                                        |                                  |
| CUSTOMER                                                                                                                                                |                                         |                                                                                                                        |                                  |
| MATERIAL                                                                                                                                                | Green Tea Matcha                        | DESCRIPTION                                                                                                            |                                  |
|                                                                                                                                                         |                                         | INVOICE NUMBER                                                                                                         |                                  |
| QUANTITY                                                                                                                                                | 0.100 KG                                | TRADE NAME                                                                                                             |                                  |
| BATCH NUMBER                                                                                                                                            | 421A200473                              | CUST. MAT. CODE                                                                                                        |                                  |
| INSPECTION LOT NO                                                                                                                                       | 40000092186                             | BEST BEFORE                                                                                                            |                                  |
| MANUFACTURING DATE                                                                                                                                      |                                         | PO REF No / DATE                                                                                                       |                                  |
| Remarks                                                                                                                                                 |                                         |                                                                                                                        |                                  |
|                                                                                                                                                         |                                         |                                                                                                                        |                                  |
| PHYSICAL AND ANALYTICAL DATA                                                                                                                            |                                         |                                                                                                                        |                                  |
| SLNO                                                                                                                                                    | QUALITY PARAMETER                       | RESULT                                                                                                                 | TEST METHOD                      |
|                                                                                                                                                         | Organoleptic Characteristics            |                                                                                                                        |                                  |
| 1                                                                                                                                                       | Odour                                   | Mild odour of tea                                                                                                      | Sensory(QM/1011)                 |
| 2                                                                                                                                                       | Colour-Visual                           | Greenish Yellow                                                                                                        | General Inspection plan          |
| 3                                                                                                                                                       | Appearance                              | Fine powder                                                                                                            | Sensory(QM/1011)                 |
| 4                                                                                                                                                       | Taste                                   | Bitter                                                                                                                 | Sensory(QM/1011)                 |
|                                                                                                                                                         | Physical Characteristics                |                                                                                                                        |                                  |
| 1                                                                                                                                                       | Tapped Bulk Density                     | 0.7782 g/ml                                                                                                            | ASTA 25.0, IVth Edition 1997     |
| 2                                                                                                                                                       | Loss On Drying                          | 2.19 %                                                                                                                 | Moisture by gravimetry           |
|                                                                                                                                                         | Chemical Characteristics                |                                                                                                                        |                                  |
| 1                                                                                                                                                       | Epi Galo Catechin Gallate               | 12.62 %                                                                                                                | Food Research International      |
| 2                                                                                                                                                       | Total Catechins                         | 32.71 %                                                                                                                | Food Research International      |
| 3                                                                                                                                                       | pH of 1% Solution                       | 5.40                                                                                                                   | pH Measurement                   |
| 4                                                                                                                                                       | Caffeine                                | 5.92 %                                                                                                                 | Liquid Chromatography            |
| 5                                                                                                                                                       | Polyphenols                             | 76.48 %                                                                                                                | Spectrometry                     |
| 6                                                                                                                                                       | Granulometry (Sieving) Through 70 Mesh  | 98 %                                                                                                                   | ASTA Method No.10.0              |
| 7                                                                                                                                                       | Ash Content                             | <10 %                                                                                                                  | ASTA Method 3.0                  |
| 8                                                                                                                                                       | Water Solubility At 1% Green Tea Matcha | >95 %                                                                                                                  | Visual Evaluation-Dispersibility |
|                                                                                                                                                         | Microbiology                            |                                                                                                                        |                                  |
| Approval Date : 23.02.2020                                                                                                                              |                                         |                                                                                                                        |                                  |
| The result of batch no : 421A200473 corresponds to the sample submitted to the lab.                                                                     |                                         |                                                                                                                        |                                  |
| 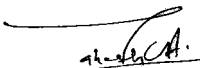<br>Prepared by :Mahesh                                               |                                         | <br>Microbiology by :Rachana        |                                  |
|                                                                                                                                                         |                                         | <br>Approved by :Krishnakumar K R |                                  |

QUALITY ASSURANCE LABORATORY

SYN/QLC-024/E

Email : qchelpdesk@synthite.com

CERTIFICATE OF ANALYSIS

[This test report shall not be reproduced except in full without the written approval of the lab.The results in this report relate to the items tested]

|                    |                  |                  |  |
|--------------------|------------------|------------------|--|
| CUSTOMER           |                  |                  |  |
| MATERIAL           | Green Tea Matcha | DESCRIPTION      |  |
| QUANTITY           | 0.100 KG         | INVOICE NUMBER   |  |
| BATCH NUMBER       | 421A200473       | TRADE NAME       |  |
| INSPECTION LOT NO  | 40000092186      | CUST. MAT. CODE  |  |
| MANUFACTURING DATE |                  | BEST BEFORE      |  |
|                    |                  | PO REF No / DATE |  |

Remarks

| PHYSICAL AND ANALYTICAL DATA |                                     |               |                                         |
|------------------------------|-------------------------------------|---------------|-----------------------------------------|
| SLNO                         | QUALITY PARAMETER                   | RESULT        | TEST METHOD                             |
| 1                            | T. P. C                             | 100 cfu/g     | BAM,online January,2001 Chapter-3       |
| 2                            | T. Y. M. C                          | 30 cfu/g      | BAM, online, April, 2001 Chapter - 18   |
| 3                            | Enterobacteriaceae                  | <10 cfu/g     | APHA IV th Edition                      |
| 4                            | E.Coli                              | <3 mpn/g      | BAM, online, February, 2013 Chapter - 4 |
| 5                            | Salmonella                          | Absent in 25g | BAM, online, August, 2016 Chapter - 5   |
| 6                            | Staphylococcus Aureus (Qualitative) | Absent in 25g | IS 5887 1976 (reaff 2005) PART II       |
|                              | <b>Mycotoxin</b>                    |               |                                         |
| 1                            | Aflatoxin Total                     | <0.5 mg/kg    | ASTA 24.2, 1997 Edition                 |
|                              | <b>Heavy Metals</b>                 |               |                                         |
| 1                            | Lead                                | <2 mg/kg      | AOAC 19th Edition 999.11                |
| 2                            | Arsenic                             | <1 mg/kg      | AOAC 19th Edition 999.11                |
| 3                            | Cadmium                             | <1 mg/kg      | AOAC 19th Edition 999.11                |
| 4                            | Mercury                             | <0.1 mg/kg    | AOAC 19th Edition 999.11                |

Approval Date : 23.02.2020

The result of batch no : 421A200473 corresponds to the sample submitted to the lab.

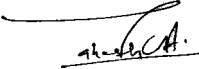  
Prepared by :Mahesh

  
Microbiology by :Rachana

  
Approved by :Krishnakumar K R
