# Supplementary material for: Green Tea Leaves and Rosemary Extracts Selectively Induce Cell Death in Triple-Negative Breast Cancer Cells and Cancer Stem Cells and Enhance the Efficacy of Common Chemotherapeutics
Source: Hindawi journal article supplement (doi:10.1155/2024/9458716), 2024-01-25
Supplement: f1 [file 9458716.f1.zip]

## Catechins Calculation

23-02-2020

**421-1437 421A200473**

| <u>Components</u> | <u>Area Of</u><br><u>Sample</u> | <u>Wt Of</u><br><u>Sample</u><br><u>(gms)</u> | <u>Area Of</u><br><u>Ref</u> | <u>Wt Of</u><br><u>Std</u><br><u>(gms)</u> | <u>Purity</u><br><u>Of Std</u><br><u>(%)</u> | <u>%Component</u> |
|-------------------|---------------------------------|-----------------------------------------------|------------------------------|--------------------------------------------|----------------------------------------------|-------------------|
| <b>EGC</b>        | 259218                          |                                               | 220657                       |                                            | 12.11                                        | <b>13.69</b>      |
| <b>CAFFEINE</b>   | 1522591                         |                                               | 1732057                      |                                            | 7.00                                         | <b>5.92</b>       |
| <b>CATECHIN</b>   | 43963                           |                                               | 83800                        |                                            | 1.40                                         | <b>0.71</b>       |
| <b>EC</b>         | 225561                          | <b>0.0555</b>                                 | 306178                       | <b>0.0534</b>                              | 3.34                                         | <b>2.37</b>       |
| <b>EGCG</b>       | 1616970                         |                                               | 5024671                      |                                            | 40.75                                        | <b>12.62</b>      |
| <b>GCG</b>        | 75883                           |                                               | 218021                       |                                            | 1.76                                         | <b>0.59</b>       |
| <b>ECG</b>        | 446120                          |                                               | 1759199                      |                                            | 11.22                                        | <b>2.74</b>       |

Polyphenols = **76.48** %

Catechins = **32.71**

## Sample Information

Prominence-3

Acquired by : ROMARIO  
Sample Name : CATECHIN STD  
Sample ID : CATECHINS  
Injection Volume : 20 uL  
Vial Position : 1  
Data Filename : CATECHIN STD\_001.lcd  
Method Filename : CATECHINS.lcm  
Date Acquired : 02/23/2020 10:27:56 AM  
Data Processed : 02/23/2020 12:47:04 PM

## Chromatogram

mV

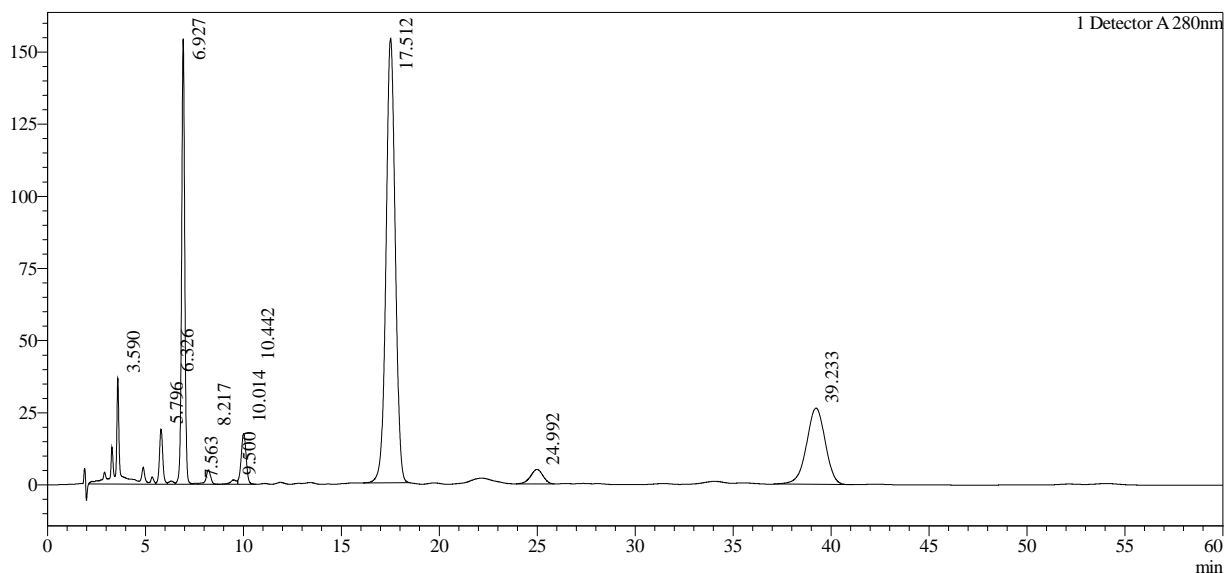

## Peak Table

Detector A 280nm

| Peak# | Name | Ret. Time | Area     | Height | Conc.  | Tailing Factor | Theoretical PlatES |
|-------|------|-----------|----------|--------|--------|----------------|--------------------|
| 1     |      | 3.590     | 668671   | 36703  | 6.638  | 1.100          | 5041               |
| 2     |      | 5.796     | 220657   | 19019  | 2.191  | 1.093          | 5922               |
| 3     |      | 6.326     | 18666    | 1064   | 0.185  | --             | 2222               |
| 4     |      | 6.927     | 1732057  | 154406 | 17.196 | 1.012          | 8657               |
| 5     |      | 7.563     | 4901     | 332    | 0.049  | --             | 453                |
| 6     |      | 8.217     | 83800    | 5048   | 0.832  | --             | 6624               |
| 7     |      | 9.500     | 35251    | 1523   | 0.350  | --             | 2911               |
| 8     |      | 10.014    | 306178   | 17558  | 3.040  | --             | 7541               |
| 9     |      | 10.442    | 659      | 145    | 0.007  | --             | --                 |
| 10    |      | 17.512    | 5024671  | 154010 | 49.884 | 1.018          | 6719               |
| 11    |      | 24.992    | 218021   | 4984   | 2.164  | 0.938          | 7305               |
| 12    |      | 39.233    | 1759199  | 26431  | 17.465 | 0.963          | 8111               |
| Total |      |           | 10072732 | 421222 |        |                |                    |

## Sample Information

Prominence-3

Acquired by : ROMARIO  
Sample Name : 421-1437 421k200473  
Sample ID : CATECHINS  
Injection Volume : 20 uL  
Vial Position :2  
Data Filename : 421-1437 421A200473\_002.lcd  
Method Filename : CATECHINS.lcm  
Date Acquired : 02/23/2020 1:34:13 PM  
Data Processed : 02/23/2020 2:50:55 PM

## Chromatogram

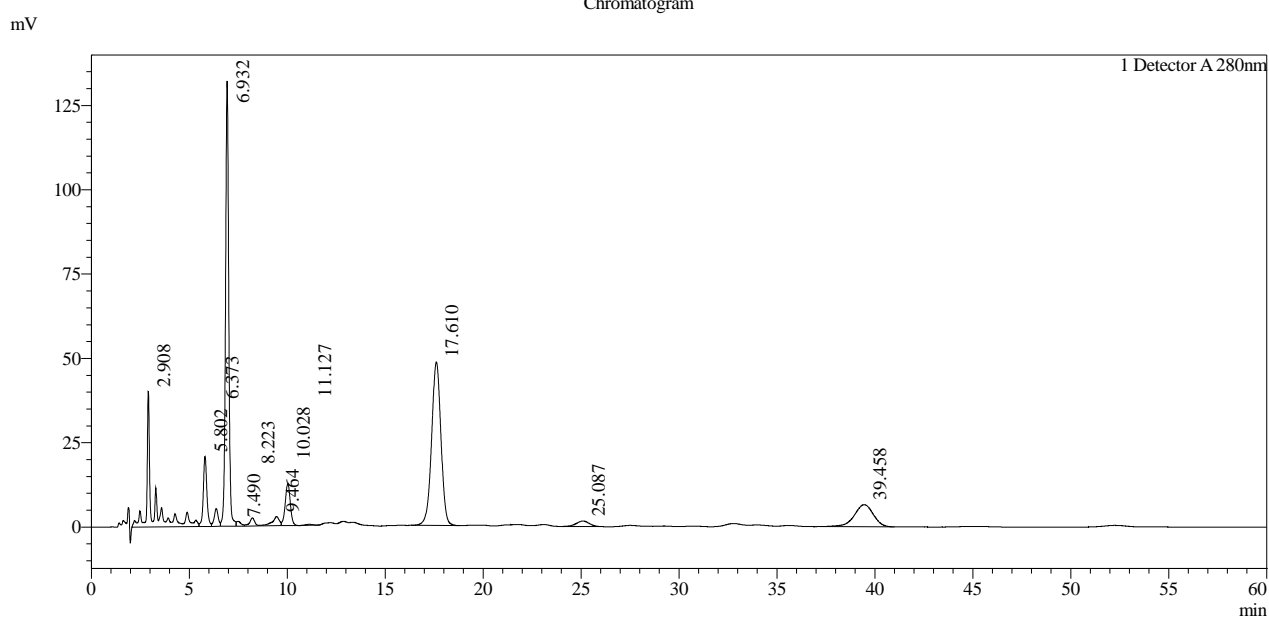

## Peak Table

Detector A 280nm

| Peak# | Name | Ret. Time | Area    | Height | Conc.  | Tailing Factor | Theoretical PlatES |
|-------|------|-----------|---------|--------|--------|----------------|--------------------|
| 1     |      | 2.908     | 698333  | 40226  | 13.795 | 1.235          | 3724               |
| 2     |      | 5.802     | 259218  | 20746  | 5.121  | 1.066          | 5406               |
| 3     |      | 6.373     | 75371   | 5283   | 1.489  | --             | 4597               |
| 4     |      | 6.932     | 1522591 | 132039 | 30.077 | 1.016          | 8465               |
| 5     |      | 7.490     | 22098   | 1394   | 0.437  | --             | 524                |
| 6     |      | 8.223     | 43963   | 2429   | 0.868  | --             | 5812               |
| 7     |      | 9.464     | 70123   | 2742   | 1.385  | --             | 4489               |
| 8     |      | 10.028    | 225561  | 12414  | 4.456  | --             | 7150               |
| 9     |      | 11.127    | 6092    | 273    | 0.120  | 0.828          | 4351               |
| 10    |      | 17.610    | 1616970 | 48502  | 31.941 | 0.986          | 6582               |
| 11    |      | 25.087    | 75883   | 1641   | 1.499  | 0.996          | 6754               |
| 12    |      | 39.458    | 446120  | 6562   | 8.813  | 0.910          | 8082               |
| Total |      |           | 5062324 | 274251 |        |                |                    |
