# Supplementary material for: Green Tea Leaves and Rosemary Extracts Selectively Induce Cell Death in Triple-Negative Breast Cancer Cells and Cancer Stem Cells and Enhance the Efficacy of Common Chemotherapeutics
Source: Hindawi journal article supplement (doi:10.1155/2024/9458716), 2024-01-25
Supplement: f1 [file 9458716.f1.zip]

# ==== Synthite Industries Pvt Ltd Analysis Report ====

D:\New folder\188 data\E\DATA\ROSMARINIC ACID\ (08.01.20) Rosemary exrt.lcd

Acquired by : Admin  
Sample Name : (08.01.20) Rosemary exrt  
Sample ID : Rosemary  
Tray# : 2  
Vail # : 52  
Injection Volume : 20 uL  
Data File Name : (08.01.20) Rosemary exrt.lcd  
Method File Name : ROSMARINIC ACID.lcm  
Batch File Name :  
Report File Name : Default.lcr  
Data Acquired : 1/8/2020 4:33:28 PM  
Data Processed : 1/8/2020 5:39:07 PM

## <Chromatogram>

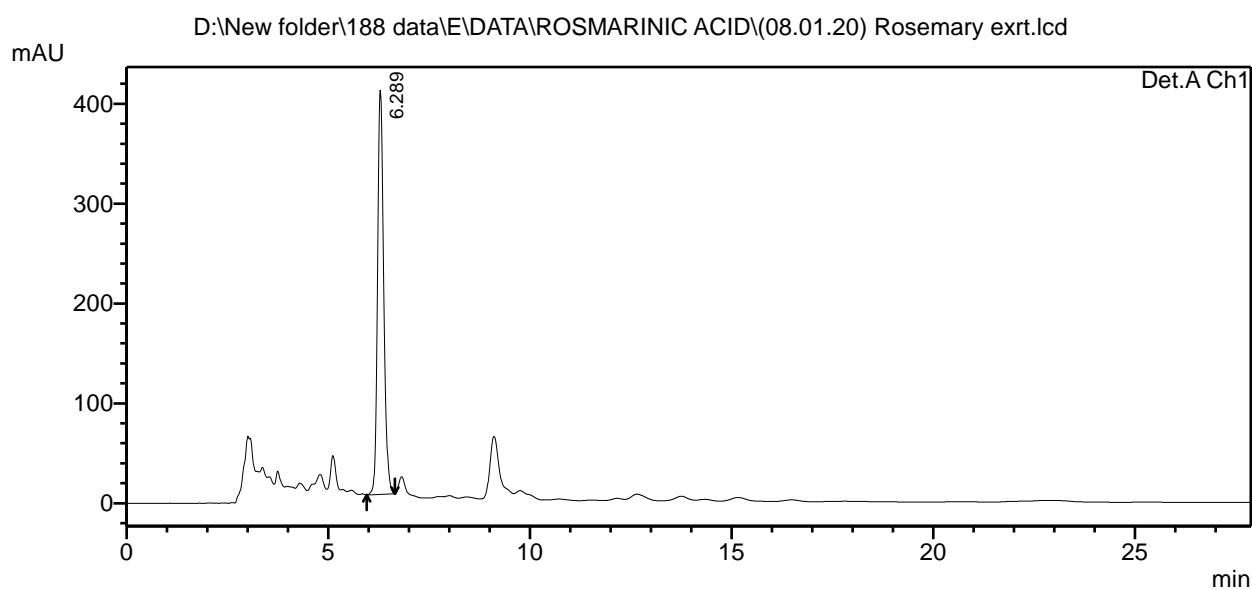

## PeakTable

### Detector A Ch1 330nm

| Peak# | Ret. Time | Area    | Height | Area %  | Height % |
|-------|-----------|---------|--------|---------|----------|
| 1     | 6.289     | 4267918 | 404796 | 100.000 | 100.000  |
| Total |           | 4267918 | 404796 | 100.000 | 100.000  |

%Rosmarinic acid = 4.6%
