# Supplementary material for: Green Tea Leaves and Rosemary Extracts Selectively Induce Cell Death in Triple-Negative Breast Cancer Cells and Cancer Stem Cells and Enhance the Efficacy of Common Chemotherapeutics
Source: Evid Based Complement Alternat Med. 2024 Jan 25;2024:9458716. doi: 10.1155/2024/9458716 (PMC11458307; doi:10.1155/2024/9458716)
Supplement: Supplementary Materials — HPLC analysis profiles and certificate of analysis (COA) for both extracts have been provided in Supplementary files. [file 9458716.f1.zip]

Archive with 4 entries (4 files):
- Green Tea Ext - HPLC Chromatograms.pdf
- Green tea Ext COA.pdf
- Rosemary Ext - HPLC Chromatogram.pdf
- Rosemary Ext COA.pdf
